# Supplementary material for: Circular RNA biogenesis can proceed through an exon-containing lariat precursor
Source: PubMed Central journal article supplement (PMC4479058; doi:10.7554/elife.07540), 2015-06-09
Supplement: elife07540s001.pdf [file elife07540s001.pdf]

Supplementary file 1

| <b>QuikChange primers</b>                   |                                                        |
|---------------------------------------------|--------------------------------------------------------|
| mrps16_5ss1QC_fwd                           | CGTAGTTGCGAATGCATGAGGATGAAAACATACC                     |
| mrps16_5ss1QC_rev                           | GGTATGTTTTTCATCCTCATGCATTTCGCAACTACG                   |
| mrps16_3ss1QC_fwd                           | C GACTTTGT TAACTCAATATGAAAGCACCTCAAGCC                 |
| mrps16_3ss1QC_rev                           | GGCTTGAGGTGCTTTCATATTGAGTTAACAAAGTCG                   |
| mrps16_bp1QC_fwd                            | GGTTCGACTTTG TCAATATAGGAAAGCACCTC                      |
| mrps16_bp1QC_rev                            | GAGGTGCTTTCCTATATTGACAAAGTCGAACC                       |
| mrps16_5ss2QC_fwd                           | CCGCTCTTTAGCTGAAAAGCCAAGCTCTC                          |
| mrps16_5ss2QC_rev                           | GAGAGCTTGGCTTTTCAGCTAAAGAGCGG                          |
| mrps16_3ss2QC_fwd                           | CTTTTTTCACTTTTTTCCAGTTGCTTCCTAAAAAACCCG                |
| mrps16_3ss2QC_rev                           | CGGGTTTTTTAGGAAGCAACTGGAAAAAAGTGAAAAAAG                |
| mrps16_bp2QC_fwd                            | CTATCAATTCTTGTTACTTTTTTCACTTTTAGTTCCAGTTGC             |
| mrps16_bp2QC_rev                            | GCAACTGGAAC TAAAAGTGAAAAAAGTAACAAGAATTGATAG            |
| pub1_bp3QC_fwd                              | GATTA AAAACAATGTTTAATTCTTTAGTAATGTTACAGATAATAG<br>CACC |
| pub1_bp3QC_rev                              | GGTGCTATTATCTGTAACATTACTAAAGAATTAACATTGTTTTTA<br>ATC   |
| mrps16_Δ90_Exon2QC_fwd                      | CCTATCGAAACCATCGGCACTTTTGGTGTAGGAGCACAACCATCC<br>GACAC |
| mrps16_Δ90_Exon2QC_rev                      | GTGTCGGATGGTTGTGCTCCTACACCAAAGTGCCGATGGTTTCG<br>ATAGG  |
| <b>mrps16 exon deletion library primers</b> |                                                        |
| mrps16_del_col_fwd_1                        | AGCTGAAAAGGTATGCCCA                                    |
| mrps16_del_col_fwd_2                        | CCGTCCGCTCTTTAGCTG                                     |
| mrps16_del_col_fwd_3                        | CAACCATCCGACACCGT                                      |
| mrps16_del_col_fwd_4                        | TTGGATAAGTGTAGGAGCACAA                                 |
| mrps16_del_col_fwd_5                        | ACGTTGAACGTTTTTAAATATTGGATAA                           |
| mrps16_del_col_fwd_6                        | CAGCTCAACGTTGAACGTTT                                   |
| mrps16_del_col_fwd_7                        | TCCTCGTATAAAAGATATCCAGCTC                              |
| mrps16_del_col_fwd_8                        | CAGGACTCCATTCCCTCGTATAA                                |
| mrps16_del_col_fwd_9                        | CTAAGAAGATTGATTCTCAGGACTC                              |
| mrps16_del_col_fwd_10                       | TTGATCCCATCCCTAAGAAGATT                                |
| mrps16_del_col_fwd_11                       | ATCGGCACTTTTGATCCCA                                    |
| mrps16_del_col_fwd_12                       | CAAACCTATCGAAACCATCGG                                  |
| mrps16_del_col_rev_1                        | AGGTGCTTTCCTATATTGAGTTAAC                              |
| mrps16_del_col_rev_2                        | TGGCTTGAGGTGCTTTCC                                     |
| mrps16_del_col_rev_3                        | GATGGTTTCGATAGGTTTGGC                                  |
| mrps16_del_col_rev_4                        | GATCAAAAGTGCCGATGGTT                                   |
| mrps16_del_col_rev_5                        | AATCTTCTTAGGGATGGGATCAA                                |
| mrps16_del_col_rev_6                        | GGAGTCCTGAGAATCAATCTTCTT                               |
| mrps16_del_col_rev_7                        | ACGAGGAATGGAGTCCTGA                                    |
| mrps16_del_col_rev_8                        | GTTGAGCTGGATATCTTTTATACGAG                             |
| mrps16_del_col_rev_9                        | CGTTCAACGTTGAGCTGGAT                                   |
| mrps16_del_col_rev_10                       | CTACACTTATCCAATATTTAAAACGTTCA                          |
| mrps16_del_col_rev_11                       | TGTGCTCCTACACTTATCCAAT                                 |
| mrps16_del_col_rev_12                       | GTCGGATGGTTGTGCTCC                                     |
